# Supplementary material for: Multifaceted atlases of the human brain in its infancy
Source: PubMed Central journal article supplement (PMC9834057; doi:10.1038/s41592-022-01703-z), 2022-12-30
Supplement: 41592_2022_1703_MOESM2_ESM.pdf [file 41592_2022_1703_MOESM2_ESM.pdf]

## Reporting Summary

Nature Research wishes to improve the reproducibility of the work that we publish. This form provides structure for consistency and transparency in reporting. For further information on Nature Research policies, see our [Editorial Policies](#) and the [Editorial Policy Checklist](#).

### Statistics

For all statistical analyses, confirm that the following items are present in the figure legend, table legend, main text, or Methods section.

n/a Confirmed

- The exact sample size ( $n$ ) for each experimental group/condition, given as a discrete number and unit of measurement
- A statement on whether measurements were taken from distinct samples or whether the same sample was measured repeatedly
- The statistical test(s) used AND whether they are one- or two-sided  
*Only common tests should be described solely by name; describe more complex techniques in the Methods section.*
- A description of all covariates tested
- A description of any assumptions or corrections, such as tests of normality and adjustment for multiple comparisons
- A full description of the statistical parameters including central tendency (e.g. means) or other basic estimates (e.g. regression coefficient) AND variation (e.g. standard deviation) or associated estimates of uncertainty (e.g. confidence intervals)
- For null hypothesis testing, the test statistic (e.g.  $F$ ,  $t$ ,  $r$ ) with confidence intervals, effect sizes, degrees of freedom and  $P$  value noted  
*Give  $P$  values as exact values whenever suitable.*
- For Bayesian analysis, information on the choice of priors and Markov chain Monte Carlo settings
- For hierarchical and complex designs, identification of the appropriate level for tests and full reporting of outcomes
- Estimates of effect sizes (e.g. Cohen's  $d$ , Pearson's  $r$ ), indicating how they were calculated

*Our web collection on [statistics for biologists](#) contains articles on many of the points above.*

### Software and code

Policy information about [availability of computer code](#)

Data collection

Data analysis https://iba.yaplab.io).

For manuscripts utilizing custom algorithms or software that are central to the research but not yet described in published literature, software must be made available to editors and reviewers. We strongly encourage code deposition in a community repository (e.g. GitHub). See the Nature Research [guidelines for submitting code & software](#) for further information.

### Data

Policy information about [availability of data](#)

All manuscripts must include a [data availability statement](#). This statement should provide the following information, where applicable:

- Accession codes, unique identifiers, or web links for publicly available datasets
- A list of figures that have associated raw data
- A description of any restrictions on data availability

The infant brain atlases are available at Zenodo (<https://doi.org/10.5281/zenodo.7044932>) under the Creative Commons Attribution Non Commercial Share Alike 4.0 International license.

The MRI data used in this work can be obtained from the National Institute of Mental Health Data Archive (NDA, <https://nda.nih.gov/>) or by contacting the investigative team. Source data for quantitative results in the main Figures 4, 5, and 6, Extended Data Figures 8 and 10, and Supplementary Figures 5, 7, 8, 10, 12, 13, and 17 are provided as Excel spreadsheets with this paper.

## Field-specific reporting

Please select the one below that is the best fit for your research. If you are not sure, read the appropriate sections before making your selection.

Life sciences       Behavioural & social sciences       Ecological, evolutionary & environmental sciences

For a reference copy of the document with all sections, see [nature.com/documents/nr-reporting-summary-flat.pdf](https://www.nature.com/documents/nr-reporting-summary-flat.pdf)

## Life sciences study design

All studies must disclose on these points even when the disclosure is negative.

|                 |                                                                                                                                                                                                                                                                                                                                                                                                                                                                                                                                                                                                                                                                                                                                                                                                                                                                                                                                                                                                                                                        |
|-----------------|--------------------------------------------------------------------------------------------------------------------------------------------------------------------------------------------------------------------------------------------------------------------------------------------------------------------------------------------------------------------------------------------------------------------------------------------------------------------------------------------------------------------------------------------------------------------------------------------------------------------------------------------------------------------------------------------------------------------------------------------------------------------------------------------------------------------------------------------------------------------------------------------------------------------------------------------------------------------------------------------------------------------------------------------------------|
| Sample size     | Longitudinal T1w and T2w MRI scans were acquired for 37 subjects (20 females; 17 males) enrolled as part of the UNC/UMN Baby Connectome Project (BCP). The subjects enrolled in the BCP study were divided into six cohorts (A1, A2, A3, B1, B2, B3), and each cohort's first visit was scheduled at 2 weeks, 1, 2, 9, 10, and 11 months, respectively. The subjects in A1, A2, and A3 were scheduled to be scanned every three months in the first year and then at 24 months; whereas, the subjects in B1, B2, and B3 were scanned every three months for the first two years. The total number of scans for each subject is different since all subjects cannot be scanned at all expected time points. A total of 108 scans for each imaging modality were used in the current work.<br><br>Empirical results indicate that brain atlas variability decreases with sample size and reaches a subvoxel level with 30 samples (Supplementary Note 4). Thus, 108 longitudinal MRI scans from 37 subjects are sufficient for the purpose of this work. |
| Data exclusions | Data affected by artifacts, such as those caused by motion, were not included in our dataset.                                                                                                                                                                                                                                                                                                                                                                                                                                                                                                                                                                                                                                                                                                                                                                                                                                                                                                                                                          |
| Replication     | We showed and discussed at length that our atlases reproduce findings observed in previous studies about brain development.                                                                                                                                                                                                                                                                                                                                                                                                                                                                                                                                                                                                                                                                                                                                                                                                                                                                                                                            |
| Randomization   | Randomization is not applicable because this study does not involve comparison between groups.                                                                                                                                                                                                                                                                                                                                                                                                                                                                                                                                                                                                                                                                                                                                                                                                                                                                                                                                                         |
| Blinding        | Blinding is not applicable because this study does not involve comparison between groups.                                                                                                                                                                                                                                                                                                                                                                                                                                                                                                                                                                                                                                                                                                                                                                                                                                                                                                                                                              |

## Reporting for specific materials, systems and methods

We require information from authors about some types of materials, experimental systems and methods used in many studies. Here, indicate whether each material, system or method listed is relevant to your study. If you are not sure if a list item applies to your research, read the appropriate section before selecting a response.

### Materials & experimental systems

| n/a                                 | Involvement in the study                                        |
|-------------------------------------|-----------------------------------------------------------------|
| <input checked="" type="checkbox"/> | <input type="checkbox"/> Antibodies                             |
| <input checked="" type="checkbox"/> | <input type="checkbox"/> Eukaryotic cell lines                  |
| <input checked="" type="checkbox"/> | <input type="checkbox"/> Palaeontology and archaeology          |
| <input checked="" type="checkbox"/> | <input type="checkbox"/> Animals and other organisms            |
| <input type="checkbox"/>            | <input checked="" type="checkbox"/> Human research participants |
| <input checked="" type="checkbox"/> | <input type="checkbox"/> Clinical data                          |
| <input checked="" type="checkbox"/> | <input type="checkbox"/> Dual use research of concern           |

### Methods

| n/a                                 | Involvement in the study                                   |
|-------------------------------------|------------------------------------------------------------|
| <input checked="" type="checkbox"/> | <input type="checkbox"/> ChIP-seq                          |
| <input checked="" type="checkbox"/> | <input type="checkbox"/> Flow cytometry                    |
| <input type="checkbox"/>            | <input checked="" type="checkbox"/> MRI-based neuroimaging |

## Human research participants

Policy information about [studies involving human research participants](#)

|                            |                                                                                                                                                                                                                                                                                                              |
|----------------------------|--------------------------------------------------------------------------------------------------------------------------------------------------------------------------------------------------------------------------------------------------------------------------------------------------------------|
| Population characteristics | Typically developing infants (51% female, 49% male), aged between birth and 5 years, were enrolled as part of the UNC/UMN Baby Connectome Project (BCP).                                                                                                                                                     |
| Recruitment                | Participants were recruited from existing registries at UNC and UMN based on state-wide birth records as well as from broader community resources (e.g., community centers and targeted day-care centers) to ensure the sample approximates the racial/ethnic and socio-economic diversity of the US census. |
| Ethics oversight           | The study protocols were approved by the Institutional Review Board of the School of Medicine of the University of North Carolina at Chapel Hill (UNC-CH), NC, USA.                                                                                                                                          |

Note that full information on the approval of the study protocol must also be provided in the manuscript.

## Experimental design

|                                 |                                                                                              |
|---------------------------------|----------------------------------------------------------------------------------------------|
| Design type                     | Not applicable; only structural MRI, involving T1-weighted and T2-weighted images, was used. |
| Design specifications           | Not applicable; only structural MRI, T1-weighted and T2-weighted images, was used.           |
| Behavioral performance measures | Not applicable; only structural MRI, T1-weighted and T2-weighted images, was used.           |

## Acquisition

|                               |                                                                            |
|-------------------------------|----------------------------------------------------------------------------|
| Imaging type(s)               | Structural T1-weighted and T2-weighted imaging.                            |
| Field strength                | 3T                                                                         |
| Sequence & imaging parameters | MPRAGE, SPACE, FOV: 256mm x 256mm, slice thickness: 0.8mm.                 |
| Area of acquisition           | Whole brain.                                                               |
| Diffusion MRI                 | <input type="checkbox"/> Used <input checked="" type="checkbox"/> Not used |

## Preprocessing

|                            |                                                                                                                                                    |
|----------------------------|----------------------------------------------------------------------------------------------------------------------------------------------------|
| Preprocessing software     | iBEAT v2.0 ( <a href="https://ibeat.wildapricot.org">https://ibeat.wildapricot.org</a> ) for tissue segmentation maps and cortical surfaces.       |
| Normalization              | Data were normalized using rigid transform.                                                                                                        |
| Normalization template     | In-house brain template.                                                                                                                           |
| Noise and artifact removal | Bias-field correction.                                                                                                                             |
| Volume censoring           | Not applicable. Only structural MRI, involving T1-weighted and T2-weighted images, was used. Images were quality-controlled before they were used. |

## Statistical modeling & inference

|                                                                           |                                                                                                                                                              |
|---------------------------------------------------------------------------|--------------------------------------------------------------------------------------------------------------------------------------------------------------|
| Model type and settings                                                   | Generalized additive mixture model (GAMM) and generalized additive model (GAM) with cubic regression, as described in the Methods section of the manuscript. |
| Effect(s) tested                                                          | Not applicable.                                                                                                                                              |
| Specify type of analysis:                                                 | <input checked="" type="checkbox"/> Whole brain <input type="checkbox"/> ROI-based <input type="checkbox"/> Both                                             |
| Statistic type for inference<br>(See <a href="#">Eklund et al. 2016</a> ) | Models were fitted at the vertex level with goodness of fit determined via adjusted $R^2$ .                                                                  |
| Correction                                                                | Not applicable. Multiple comparisons not involved.                                                                                                           |

## Models & analysis

|                                     |                                                                       |
|-------------------------------------|-----------------------------------------------------------------------|
| n/a                                 | Involvement in the study                                              |
| <input checked="" type="checkbox"/> | <input type="checkbox"/> Functional and/or effective connectivity     |
| <input checked="" type="checkbox"/> | <input type="checkbox"/> Graph analysis                               |
| <input checked="" type="checkbox"/> | <input type="checkbox"/> Multivariate modeling or predictive analysis |
